# Supplementary material for: An enzymatically amplified electrochemical sensor for the sensitive and label-free monitoring of uranyl ions in environmental waters
Source: Royal Society of Chemistry journal article supplement (doi:10.1039/d5nj04162g), 2026-01-01
Supplement: d5nj04162g1.pdf [file d5nj04162g1.pdf]

## Supporting Information

# An enzymatically amplified electrochemical sensor for the sensitive and label-free monitoring of uranyl ions in environmental waters

Xutao Xu <sup>a, b</sup>, Zhangkun Wu <sup>a, b</sup>, Wenqi Tang <sup>c</sup>, Yihan Pang <sup>a, b</sup>, Siru Liu <sup>a, b</sup>, Guoqin Qin<sup>a, b</sup>, Yonghong Wang<sup>d</sup>, Shengyuan Yang <sup>a, b</sup>\*, Jinquan Liu <sup>a, b</sup> \*

<sup>a</sup> School of Public Health, Hengyang Medical School, University of South China, Hengyang, Hunan, 421001, People's Republic of China.

<sup>b</sup> Hunan Key Laboratory of Typical Environment Pollution and Health Hazards, University of South China, Hengyang 421001, People's Republic of China.

<sup>c</sup> School of Basic Medical Sciences, Hengyang Medical School, University of South China, Hengyang, Hunan, 421001, People's Republic of China.

<sup>d</sup> College of Life Science and Technology, Central South University of Forestry and Technology, Changsha, Hunan, 410004, People's Republic of China.

\*Corresponding Author: Shengyuan Yang and Jinquan Liu; E-mail addresses: yangshyhy@126.com (Shengyuan Yang) and letliufly@163.com (Jinquan Liu)

Table S1 Comparison of the proposed sensor with other  $\text{UO}_2^{2+}$  detection methods.

| Material                             | Method          | LOD (M)                | Linear range(M)                                | Reference |
|--------------------------------------|-----------------|------------------------|------------------------------------------------|-----------|
| CPE                                  | Colorimetric    | $2.10 \times 10^{-9}$  | $1.26 \times 10^{-8}$ - $1.05 \times 10^{-6}$  | [1]       |
| $\text{Fe}_3\text{O}_4@\text{SiO}_2$ | Electrochemical | $1.08 \times 10^{-9}$  | $1.00 \times 10^{-9}$ - $2.00 \times 10^{-7}$  | [2]       |
| PeNCs@NHS-M                          | Electrochemical | $1.00 \times 10^{-9}$  | $3.00 \times 10^{-9}$ - $2.00 \times 10^{-5}$  | [3]       |
| Ln-MOFs                              | Fluorescence    | $2.70 \times 10^{-9}$  | $1.00 \times 10^{-8}$ - $1.00 \times 10^{-4}$  | [4]       |
| TPE-A                                | Fluorescence    | $4.70 \times 10^{-9}$  | $5.00 \times 10^{-8}$ - $4.50 \times 10^{-7}$  | [5]       |
| $\text{SC4A}@\text{Tb}^{3+}$         | Fluorescence    | $8.40 \times 10^{-8}$  | $0.00$ - $3.60 \times 10^{-7}$                 | [6]       |
| TEA-CDs                              | Fluorescence    | $2.04 \times 10^{-8}$  | $0.00$ - $5.00 \times 10^{-4}$                 | [7]       |
| DNAzymes                             | Electrochemical | $4.18 \times 10^{-11}$ | $7.00 \times 10^{-11}$ - $1.50 \times 10^{-9}$ | this work |

### The calculation method for recovery rate

The recovery for spiked samples was calculated using the standard formula:

$$\text{Recovery (\%)} = \frac{M_{a+spike} - M_a}{M_{spike}}$$

Where :  $M_{a+spike}$  represents the concentration of the known standard added to the sample;  $M_a$  represents the concentration of the analyte in the raw, unspiked sample as measured using this sensor;  $M_{spike}$  is the concentration of the known standard added to the sample.

### References

- [1] A. B. Abdallah, A. M. Youins and M. R. El-Kholany, Selective separation of uranyl ions from some lanthanide elements using a promising  $\beta$ -enaminoester ligand by cloud point extraction, *RSC advances*, 2022, **12**, 8520-8529.
- [2] L. He, Z. Wang, Y. Li, J. Yang, L. Liao, X. Xiao and Y. Liu, A Novel Electrochemical Sensor Modified with a Computer-Simulative Magnetic Ion-Imprinted Membrane for Identification of Uranyl Ion, *Sensors (Basel, Switzerland)*, 2022, **22**, 4410.
- [3] Y. Cai, Q. Luo, J. Qi, X. Chen, J. Liu, L. Zhang, R. Liang and J. Qiu, Hydrogen-

Bonded Organic Cocrystal-Encapsulated Perovskite Nanocrystals as Coreactant-Free Electrochemiluminescent Luminophore for the Detection of Uranium, *Analytical chemistry*, 2024, **96**, 3553-3560.

- [4] Y. Tong, L. Yu, X. Gong, L. Wu, Y. Chen, D. Wang and G. Ouyang, On-Site Ratiometric Analysis of  $\text{UO}_2^{2+}$  with High Selectivity, *Analytical chemistry*, 2024, **96**, 3070-3076.
- [5] H. Ding, C. Li, H. Zhang, N. Lin, W. Ren, S. Li, W. Liu, Z. Xiong, B. Xia and C. Wang, A simple fluorescent sensor for highly sensitive detection of  $\text{UO}_2^{2+}$ , *Chinese Chemical Letters*, 2023, **34**, 107725.
- [6] X. Zhou, M. Gong, L. Xiong, Y. Wang, W. Jiang, J. Song and L. Li, Sensitive fluorescent determination of uranyl ions using a terbium (III) 4-sulfocalix[4]arene probe, *Journal of Radioanalytical and Nuclear Chemistry*, 2024, **333**, 1263-1274.
- [7] Q. Wang, H. Zhang, D. Yu, W. Qin and X. Wu, Ultra-sensitive and stable N-doped carbon dots for selective detection of uranium through electron transfer induced  $\text{UO}_2^{2+}$  sensing mechanism, *Carbon*, 2022, **198**, 162-170.
